# Supplementary material for: Vine Pruning-Derived Biochar for Agronomic Benefits
Source: MDPI journal article supplement (doi:10.3390/agronomy12112730), 2022-11-03
Supplement: s1 [file s1]

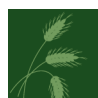

## Article

## Vine Pruning-Derived Biochar for Agronomic Benefits

Diana Egri <sup>1</sup>, Oana Cristina Pârvulescu <sup>1,\*</sup>, Violeta Alexandra Ion <sup>2,\*</sup>, Cristian Eugen Răducanu <sup>1</sup>,  
Suzana Ioana Calcan <sup>1,3</sup>, Liliana Bădulescu <sup>2</sup>, Roxana Madjar <sup>2</sup>, Cristina Orbeci <sup>4</sup>, Tănase Dobre <sup>1</sup>, Andrei Moț <sup>2</sup>,  
Lavinia Mihaela Iliescu <sup>2</sup> and Mihaela Emanuela Crăciun <sup>4</sup>

<sup>1</sup> Chemical and Biochemical Engineering Department, University POLITEHNICA of Bucharest, 1-7 Gheorghe Polizu Str., 011061 Bucharest, Romania

<sup>2</sup> Research Center for Studies of Food and Agricultural Products Quality, University of Agronomic Sciences and Veterinary Medicine of Bucharest, 59 Marasti Blvd., 011464 Bucharest, Romania

<sup>3</sup> SCIENT Research Center for Instrumental Analysis, 1 Petre Ispirescu Str., 77167 Tancabesti, Ilfov, Romania

<sup>4</sup> Analytical Chemistry and Environmental Engineering Department, University POLITEHNICA of Bucharest, 1-7 Gheorghe Polizu Str., 011061 Bucharest, Romania

\* Correspondence: oana.parvulescu@yahoo.com (O.C.P.); violeta.ion.phd@gmail.com (V.A.I.)

## Supplementary material

**Supplementary Table S1.** Initial mean values  $\pm$  SD of physicochemical properties of BC amendment, non-amended soils (S), and BC-amended soils (S + BC).

| No. | Property                  | BC                              | S1                             | S2                             | S3                             | S1 + BC                        | S2 + BC                        | S3 + BC                        |
|-----|---------------------------|---------------------------------|--------------------------------|--------------------------------|--------------------------------|--------------------------------|--------------------------------|--------------------------------|
| 1   | HU (%)                    | 3.51 $\pm$ 0.18 <sup>f</sup>    | 14.69 $\pm$ 0.34 <sup>a</sup>  | 10.43 $\pm$ 0.10 <sup>d</sup>  | 13.10 $\pm$ 0.10 <sup>b</sup>  | 12.33 $\pm$ 0.08 <sup>c</sup>  | 9.60 $\pm$ 0.17 <sup>e</sup>   | 12.36 $\pm$ 0.04 <sup>c</sup>  |
| 2   | BD (g/cm <sup>3</sup> )   | 0.319 $\pm$ 0.018 <sup>d</sup>  | 1.054 $\pm$ 0.009 <sup>b</sup> | 0.986 $\pm$ 0.035 <sup>b</sup> | 1.314 $\pm$ 0.036 <sup>a</sup> | 0.799 $\pm$ 0.020 <sup>c</sup> | 0.851 $\pm$ 0.015 <sup>c</sup> | 0.873 $\pm$ 0.038 <sup>c</sup> |
| 3   | pH                        | 9.89 $\pm$ 0.01 <sup>a</sup>    | 7.99 $\pm$ 0.01 <sup>c</sup>   | 6.26 $\pm$ 0.02 <sup>f</sup>   | 5.40 $\pm$ 0.02 <sup>g</sup>   | 8.33 $\pm$ 0.03 <sup>b</sup>   | 7.10 $\pm$ 0.03 <sup>d</sup>   | 6.45 $\pm$ 0.11 <sup>e</sup>   |
| 4   | EC (dS/m)                 | 2.04 $\pm$ 0.07 <sup>a</sup>    | 0.22 $\pm$ 0.00 <sup>c</sup>   | 0.10 $\pm$ 0.01 <sup>e</sup>   | 0.09 $\pm$ 0.00 <sup>e</sup>   | 0.35 $\pm$ 0.00 <sup>b</sup>   | 0.21 $\pm$ 0.00 <sup>c</sup>   | 0.16 $\pm$ 0.01 <sup>d</sup>   |
| 5   | C (%)                     | 76.01 $\pm$ 0.68 <sup>a</sup>   | 2.89 $\pm$ 0.10 <sup>d</sup>   | 2.01 $\pm$ 0.02 <sup>e</sup>   | 1.98 $\pm$ 0.10 <sup>e</sup>   | 10.99 $\pm$ 1.09 <sup>c</sup>  | 10.26 $\pm$ 0.63 <sup>c</sup>  | 14.35 $\pm$ 0.27 <sup>b</sup>  |
| 6   | N-NO <sub>3</sub> (mg/kg) | 5.4 $\pm$ 0.4 <sup>g</sup>      | 31.2 $\pm$ 2.2 <sup>a</sup>    | 14.9 $\pm$ 1.3 <sup>c</sup>    | 9.2 $\pm$ 0.5 <sup>e</sup>     | 26.2 $\pm$ 0.5 <sup>b</sup>    | 11.3 $\pm$ 1.0 <sup>d</sup>    | 8.0 $\pm$ 0.0 <sup>f</sup>     |
| 7   | N-NH <sub>4</sub> (mg/kg) | 15.6 $\pm$ 1.4 <sup>a</sup>     | 11.9 $\pm$ 0.2 <sup>c</sup>    | 11.3 $\pm$ 0.3 <sup>c</sup>    | 3.0 $\pm$ 0.2 <sup>e</sup>     | 13.9 $\pm$ 0.3 <sup>b</sup>    | 12.4 $\pm$ 0.3 <sup>c</sup>    | 3.7 $\pm$ 0.3 <sup>d</sup>     |
| 8   | P (mg/kg)                 | 16.0 $\pm$ 0.3 <sup>a</sup>     | 6.3 $\pm$ 0.2 <sup>d</sup>     | 2.3 $\pm$ 0.2 <sup>e</sup>     | 0.8 $\pm$ 0.2 <sup>f</sup>     | 13.6 $\pm$ 0.2 <sup>c</sup>    | 14.7 $\pm$ 0.3 <sup>b</sup>    | 2.9 $\pm$ 0.6 <sup>e</sup>     |
| 9   | K (mg/kg)                 | 3131.1 $\pm$ 183.0 <sup>a</sup> | 23.9 $\pm$ 0.3 <sup>d</sup>    | 5.5 $\pm$ 0.0 <sup>f</sup>     | 6.4 $\pm$ 0.3 <sup>e</sup>     | 132.0 $\pm$ 2.8 <sup>b</sup>   | 130.1 $\pm$ 1.9 <sup>b</sup>   | 51.1 $\pm$ 1.5 <sup>c</sup>    |

(HU) humidity; (BD) bulk density; (EC) electrical conductivity; (C) total carbon concentration; (N-NO<sub>3</sub>) soluble nitrate nitrogen concentration; (N-NH<sub>4</sub>) soluble ammonium nitrogen concentration; (P) soluble phosphorus concentration; (K) soluble potassium concentration; (BC) biochar; (S1) fluvisol soil; (S2) chernozem soil; (S3) luvisol soil; different superscript letters in the same row indicate a significant difference ( $p < 0.05$ ).
